# Supplementary material for: The contribution of YTHDF2 gene rs3738067 A>G to the Wilms tumor susceptibility
Source: PubMed Central journal article supplement (PMC8425210; doi:10.7150/jca.62154), 2021-08-26
Supplement: jcav12p6165s1.pdf [file jcav12p6165s1.pdf]

**Table S1.** Frequency distribution of selected variables in Wilms tumor patients and cancer-free controls from six included hospitals

| Variables        | Cases (N=450) |       | Controls (N=1317) |       | <i>P</i> <sup>a</sup> |
|------------------|---------------|-------|-------------------|-------|-----------------------|
|                  | No.           | %     | No.               | %     |                       |
| Age range, month | 1-168.00      |       | 0.03-156.00       |       | 0.668                 |
| Mean ± SD        | 32.70 ± 25.75 |       | 32.10 ± 25.36     |       |                       |
| ≤18              | 148           | 32.89 | 501               | 38.04 | 0.157                 |
| >18              | 302           | 67.11 | 816               | 61.96 |                       |
| Gender           |               |       |                   |       |                       |
| Female           | 211           | 46.89 | 567               | 43.05 | 0.157                 |
| Male             | 239           | 53.11 | 750               | 56.95 |                       |
| Clinical stages  |               |       |                   |       |                       |
| I                | 137           | 30.44 | /                 | /     |                       |
| II               | 122           | 27.11 | /                 | /     |                       |
| III              | 119           | 26.44 | /                 | /     |                       |
| IV               | 54            | 12.00 | /                 | /     |                       |
| NA               | 18            | 4.00  | /                 | /     |                       |

SD, standard deviation; NA, not available.

<sup>a</sup> Two-sided  $\chi^2$  test for distributions between Wilms tumor patients and cancer-free controls.

<sup>b</sup> T-test for age distribution between Wilms tumor patients and cancer-free controls.
